# Supplementary material for: Estimations of NOxemissions, NO2lifetime and their temporal variation over three British urbanised regions in 2019 using TROPOMI NO2observations
Source: Royal Society of Chemistry journal article supplement (doi:10.1039/d2ea00086e), 2022-12-19
Supplement: d2ea00086e1.pdf [file d2ea00086e1.pdf]

# Supplementary Materials for

## “Estimations of the NO<sub>x</sub> emissions, NO<sub>2</sub> lifetime and their temporal variation over three British urbanised regions in 2019 using the TROPOMI NO<sub>2</sub> observations”

Matthieu Pommier

**Tab. S1.** Signal-to-Noise Ratio (SNR) for each tested city. The size of the fitting domain is also provided.

| city        | size of the fitting domain | SNR  |
|-------------|----------------------------|------|
| London      | 100 km×100 km              | 16.1 |
| Birmingham  | 60 km×60 km                | 9.1  |
| Manchester  | 60 km×60 km                | 8.4  |
| Glasgow     | 10 km×10 km                | 4.0  |
| Bristol     | 10 km×10 km                | 3.8  |
| Belfast     | 10 km×10 km                | 3.0  |
| Southampton | 10 km×10 km                | 2.7  |
| Leeds       | 10 km×10 km                | 1.8  |
| Cardiff     | 10 km×10 km                | 1.8  |
| Swansea     | 10 km×10 km                | 1.6  |

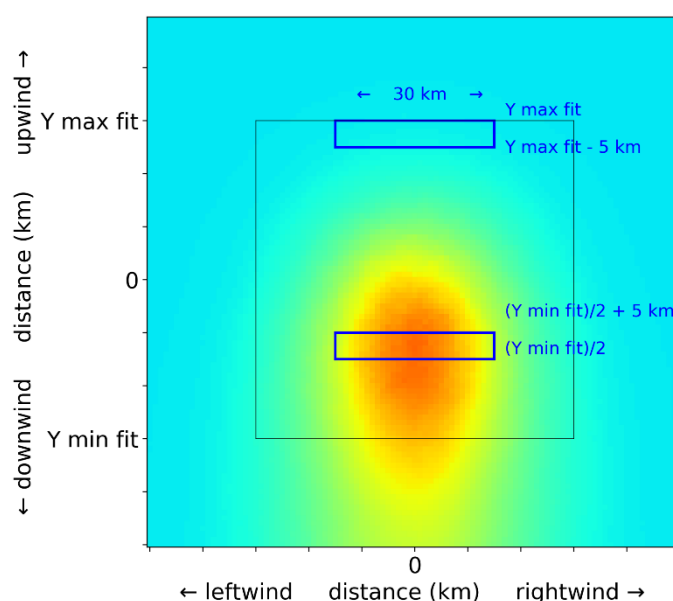

**Fig S1.** Illustration of the areas used to calculate the signal-to-noise ratio (SNR) (blue boxes). The centre of the source location is located at (0,0) on x and y axis. The thin black box shows the zone uses for the fit.

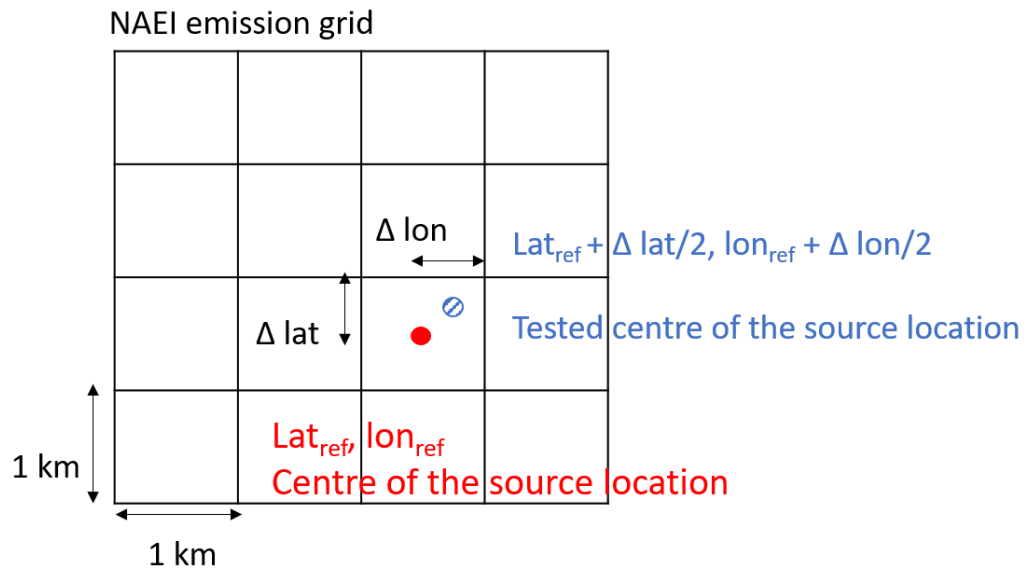

**Fig S2.** Scheme showing the change in the centre of the source location within a 1 km<sup>2</sup> grid cell. The initial centre of the source is shown with the red circle, while the shift of this centre is highlighted with the blue stripped circle.

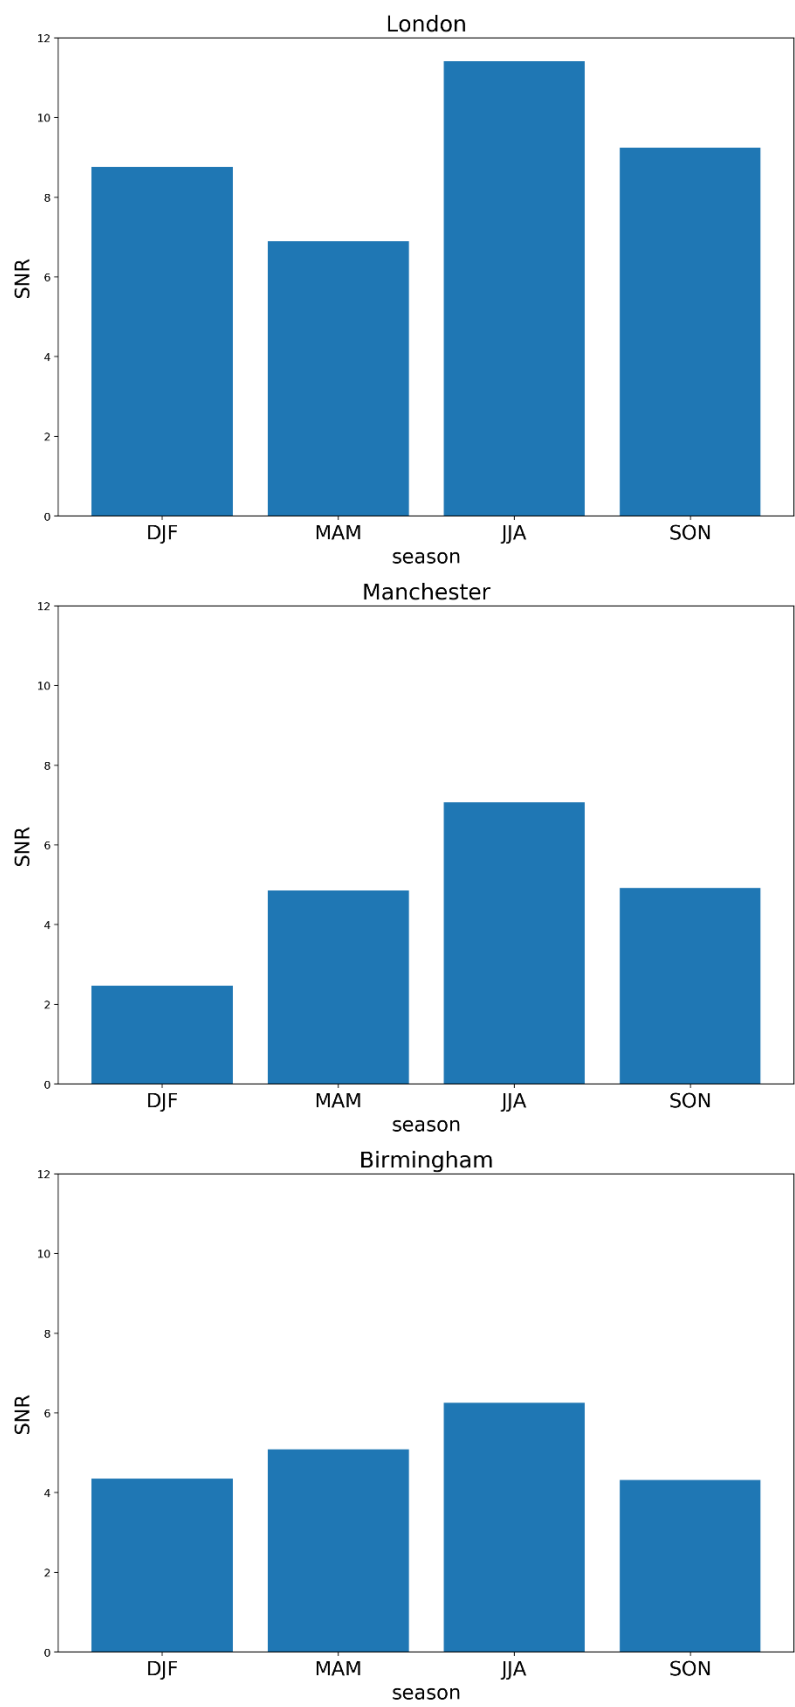

**Fig. S3.** SNR by season for London, Manchester and Birmingham.

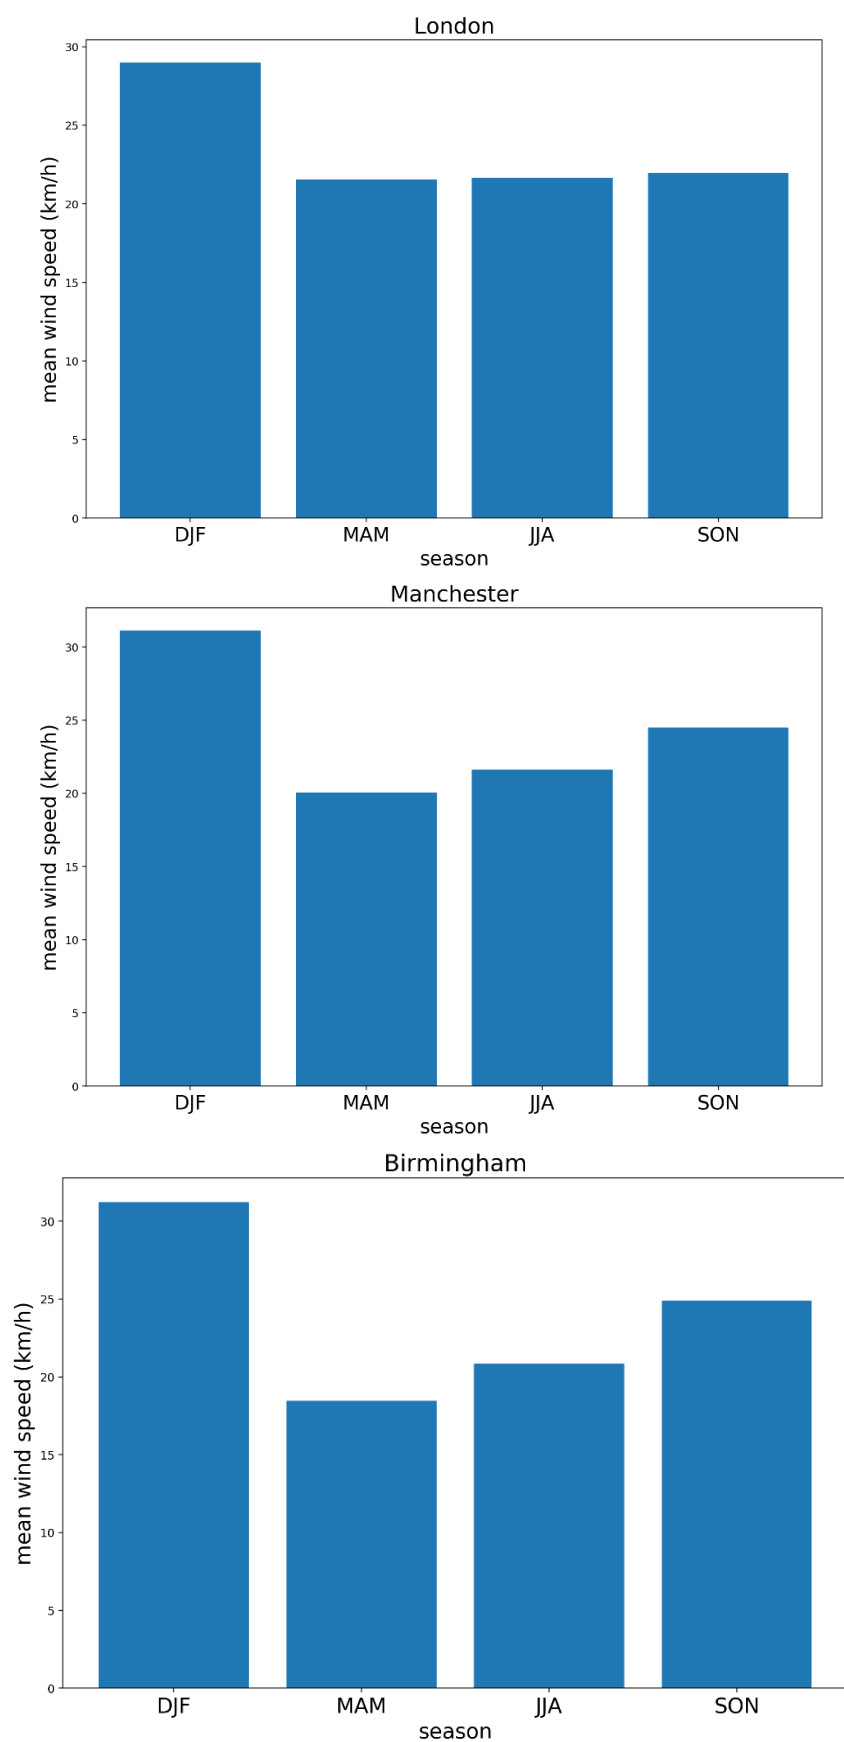

**Fig. S4.** Mean wind speed by season for London, Manchester and Birmingham.

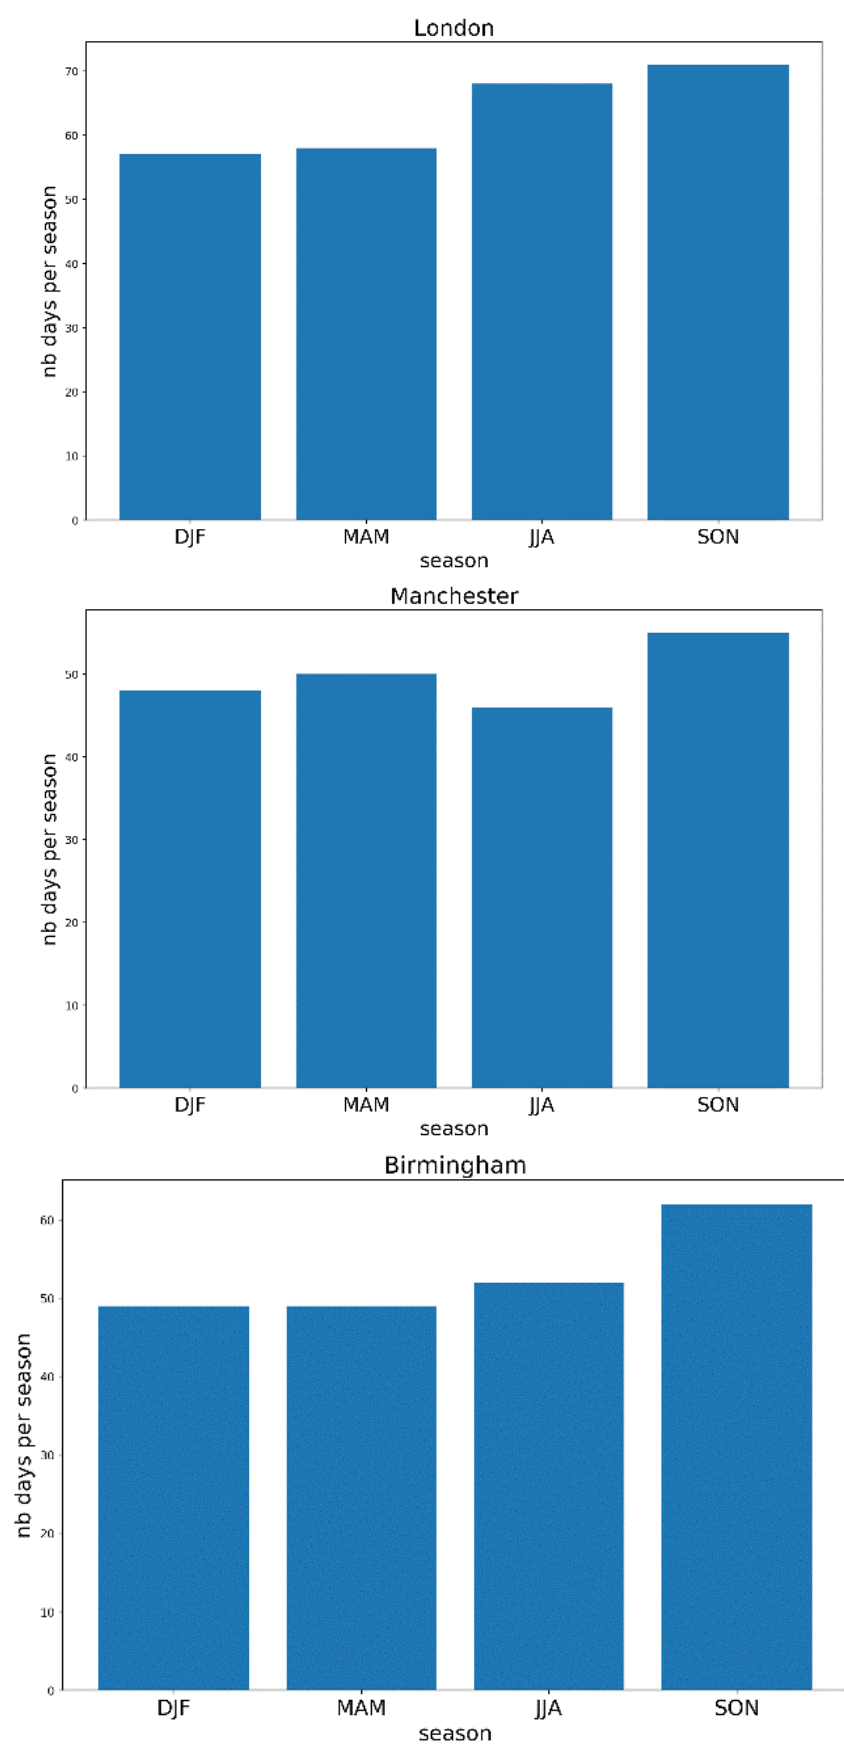

**Fig. S5.** Number of days available for the fitting procedure by season for London, Manchester and Birmingham.
